# Supplementary material for: Association between postoperative ibuprofen exposure and acute kidney injury after pediatric cardiac surgery
Source: PubMed Central journal article supplement (PMC10880564; doi:10.1080/0886022x.2024.2318417), 2024-02-19
Supplement: IRNF_A_2318417_SM2477.pdf [file IRNF_A_2318417_SM2477.pdf]

| <b>Variable</b>            | <b>Pre-PSM<br/>ASD</b> | <b>Post-PSM<br/>ASD</b> |
|----------------------------|------------------------|-------------------------|
| Age                        | 0.163                  | 0.023                   |
| Male sex                   | 0.046                  | 0.042                   |
| Weight                     | 0.169                  | 0.041                   |
| Previous cardiac surgeries | 0.255                  | 0.035                   |
| Preoperative cyanosis      | 0.060                  | 0.038                   |
| Emergent surgery           | 0.065                  | 0.073                   |
| RACHS-1 score              | 0.172                  | 0.036                   |
| CPB time $\geq$ 120 min    | 0.121                  | 0.020                   |
| Cross-clamp time           | 0.177                  | 0.028                   |
| Baseline LVEF              | 0.060                  | 0.027                   |
| Baseline serum creatinine  | 0.204                  | 0.011                   |
| Baseline serum albumin     | 0.087                  | 0.053                   |
| Baseline hemoglobin        | 0.153                  | 0.002                   |

**Supplementary Table 1.** Comparison of the extent of covariate imbalance by absolute standardized differences before and after propensity-score matching. *ASD*, absolute standardized difference; *RACHS*, Risk Adjustment for Congenital Heart Surgery; *CPB*, cardiopulmonary bypass; *LVEF*, left ventricular ejection fraction
